# Supplementary material
Source: PubMed Central journal article supplement (PMC11375756)

**Figure S1. Data analysis of 639 quantifiable corneal SASP proteins.** a, Unsupervised heat map illustrating the proteome profile of individual proteins in quiescent control and IR-induced senescent corneal cells. Blue, down-regulated; yellow, up-regulated. b, 2D PLS-DA differentiates the SASP proteins of quiescent control and IR-induced senescent corneal cells. Component 1 (56%) and Component 2 (35%) are plotted, and PLS-DA analysis was performed using R.

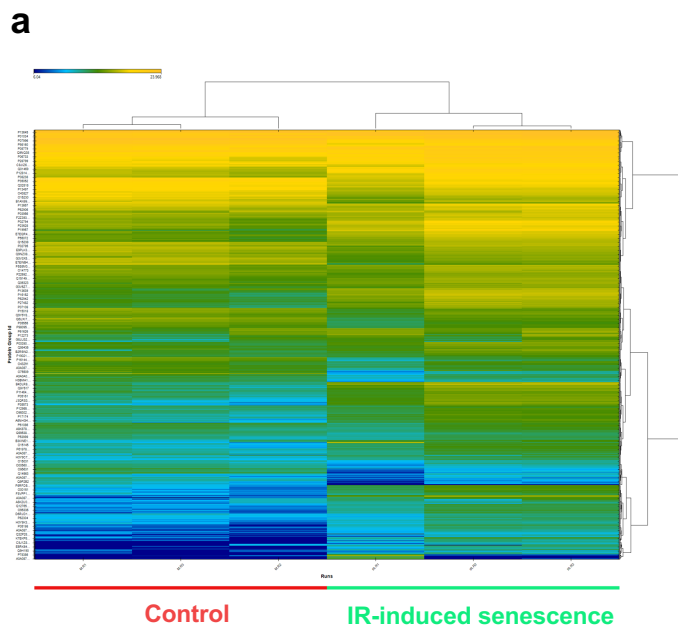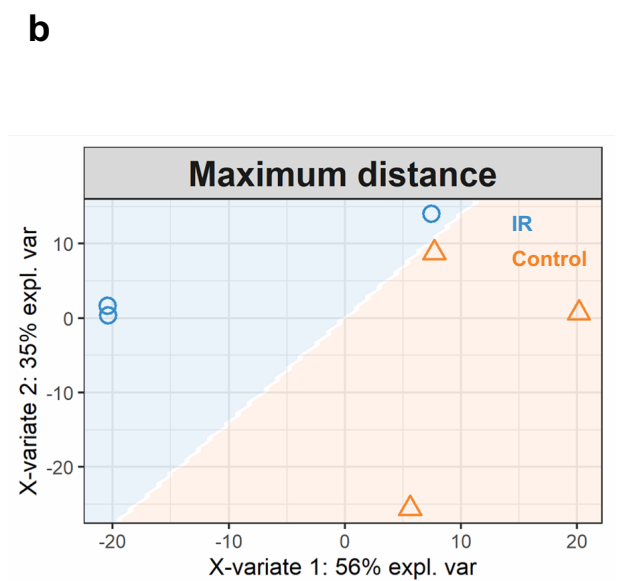

Supplement: NIHMS2008083-supplement-Figure_S1.pdf [file NIHMS2008083-supplement-Figure_S1.pdf]
