# Supplementary material
Source: PubMed Central journal article supplement (PMC11375756)
Supplement: NIHMS2008083-supplement-Figure_S2.pdf [file NIHMS2008083-supplement-Figure_S2.pdf]

**Figure S2. Up-regulation of SASP protein composition and amount in senescent corneal cells. Network function of secreted proteins significantly increased in corneal SASP.**

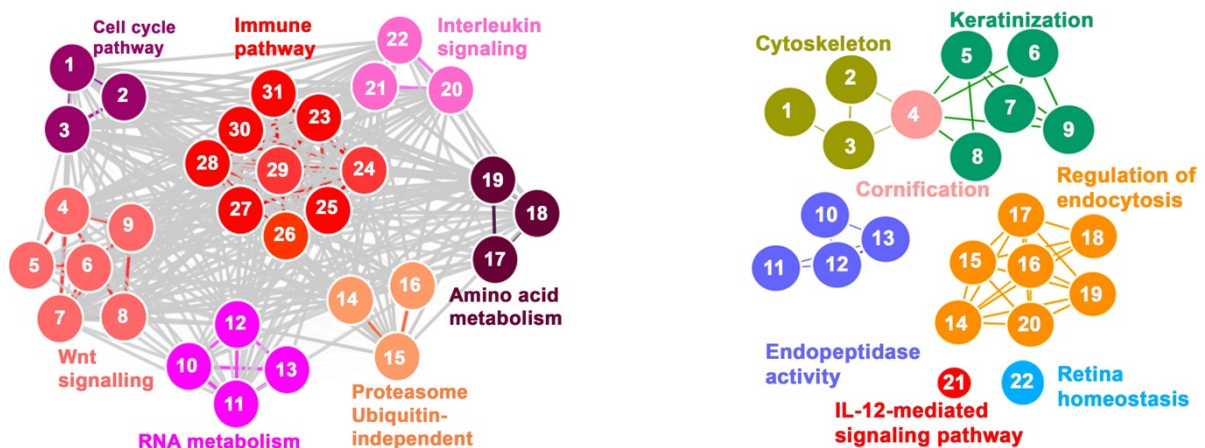

| Pathway cluster                  | Annotation | Pathway                                                                           |
|----------------------------------|------------|-----------------------------------------------------------------------------------|
| Cell cycle pathway               | 1          | Regulation of cell cycle G2/M phase transition                                    |
|                                  | 2          | Regulation of mitotic cell cycle phase transition                                 |
|                                  | 3          | Negative regulation of G2/M transition of mitotic cell cycle                      |
| Wnt signalling                   | 4          | Positive regulation of canonical Wnt signaling pathway                            |
|                                  | 5          | Wnt signaling pathway                                                             |
|                                  | 6          | Regulation of canonical Wnt signaling pathway                                     |
|                                  | 7          | Non-canonical Wnt signaling pathway                                               |
|                                  | 8          | Regulation of Wnt signaling pathway                                               |
|                                  | 9          | Cell-cell signaling by wnt                                                        |
| RNA metabolism                   | 10         | Regulation of mRNA metabolic process                                              |
|                                  | 11         | Regulation of RNA stability                                                       |
|                                  | 12         | Regulation of transcription from RNA polymerase II promoter in response to stress |
| Proteasome Ubiquitin-independent | 13         | mRNA catabolic process                                                            |
|                                  | 14         | SCF-dependent proteasomal ubiquitin-dependent protein catabolic process           |
|                                  | 15         | Proteasomal ubiquitin-independent protein catabolic process                       |
| Amino acid metabolism            | 16         | Proteasome-mediated ubiquitin-dependent protein catabolic process                 |
|                                  | 17         | Post-translational protein modification                                           |
|                                  | 18         | Cellular amino acid metabolic process                                             |
| Interleukin signaling            | 19         | Amine metabolic process                                                           |
|                                  | 20         | Cellular response to interleukin-1                                                |
|                                  | 21         | NIK/NF-kappaB signaling                                                           |
|                                  | 22         | Interleukin-1-mediated signaling pathway                                          |
| Immune pathway                   | 23         | Stimulatory C-type lectin receptor signaling pathway                              |
|                                  | 24         | Ag-processing and presentation of exogenous peptide antigen via MHC class I       |
|                                  | 25         | Cytokine-mediated signaling pathway                                               |
|                                  | 26         | Antigen processing and presentation of exogenous peptide antigen                  |
|                                  | 27         | Activation of innate immune response                                              |
|                                  | 28         | Response to lectin                                                                |
|                                  | 29         | Antigen receptor-mediated signaling pathway                                       |
|                                  | 30         | Innate immune response-activating signal transduction                             |
|                                  | 31         | Positive regulation of defense response                                           |

| Pathway cluster           | Annotation | Pathway                                         |
|---------------------------|------------|-------------------------------------------------|
| Cytoskeleton              | 1          | Intermediate filament organization              |
|                           | 2          | Intermediate filament cytoskeleton organization |
|                           | 3          | Structural constituent of cytoskeleton          |
| Cornification             | 4          | Cornification                                   |
| Keratinization            | 5          | Epidermis development                           |
|                           | 6          | Epidermal cell differentiation                  |
|                           | 7          | Keratinization                                  |
|                           | 8          | Keratinocyte differentiation                    |
|                           | 9          | Skin development                                |
| Endopeptidase activity    | 10         | Serine-type endopeptidase activity              |
|                           | 11         | Serine-type peptidase activity                  |
|                           | 12         | Negative regulation of proteolysis              |
|                           | 13         | Negative regulation of hydrolase activity       |
| Regulation of endocytosis | 14         | Neutrophil degranulation                        |
|                           | 15         | Myeloid leukocyte mediated immunity             |
|                           | 16         | Leukocyte mediated immunity                     |
|                           | 17         | Cell activation involved in immune response     |
|                           | 18         | Granulocyte activation                          |
|                           | 19         | Neutrophil activation                           |
|                           | 20         | Myeloid leukocyte activation                    |
| IL-12-mediated signaling  | 21         | Interleukin-12-mediated signaling pathway       |
| Retina homeostasis        | 22         | Retina homeostasis                              |
