# Supplementary material
Source: PubMed Central journal article supplement (PMC11375756)
Supplement: NIHMS2008083-supplement-Figure_S3.pdf [file NIHMS2008083-supplement-Figure_S3.pdf]

**Figure S3. Down-regulation of SASP protein composition and amount in senescent corneal cells.** Network function of secreted proteins significantly decreased in corneal SASP.

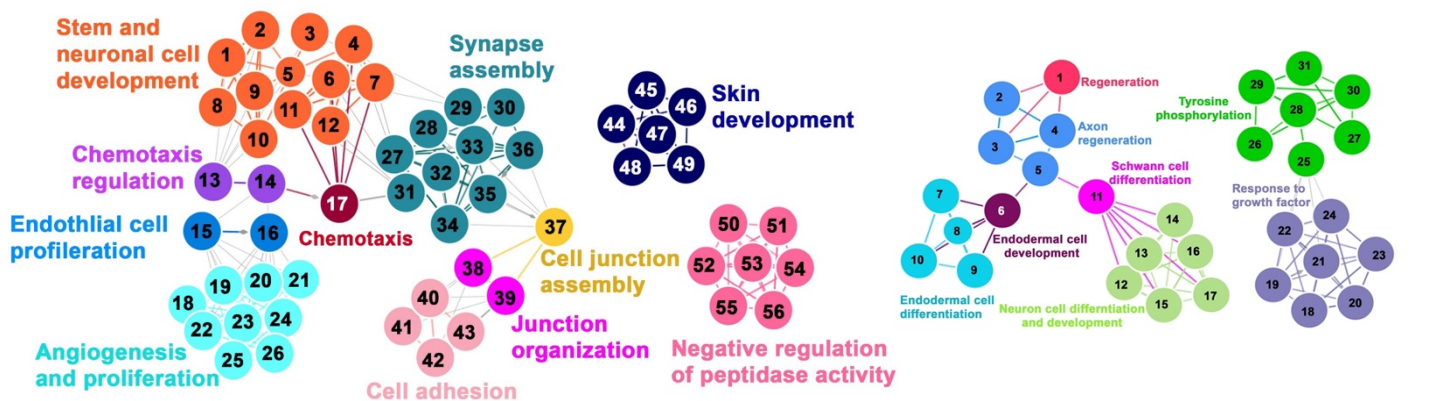

| Pathway cluster                           | Annotation       | Pathway                                               |
|-------------------------------------------|------------------|-------------------------------------------------------|
| Stem and neuronal cell development        | 1                | Neural crest cell migration                           |
|                                           | 2                | Neural crest cell differentiation                     |
|                                           | 3                | Negative regulation of neuron projection development  |
|                                           | 4                | Cell morphogenesis involved in neuron differentiation |
|                                           | 5                | Axon extension                                        |
|                                           | 6                | Axon guidance                                         |
|                                           | 7                | Neuron projection morphogenesis                       |
|                                           | 8                | Stem cell differentiation                             |
|                                           | 9                | Stem cell development                                 |
|                                           | 10               | Neural crest cell development                         |
|                                           | 11               | Axonogenesis                                          |
|                                           | 12               | Neuron projection guidance                            |
| Chemotaxis regulation                     | 13               | Negative regulation of chemotaxis                     |
|                                           | 14               | Regulation of chemotaxis                              |
| Endothelial cell proliferation            | 15               | Regulation of endothelial cell proliferation          |
|                                           | 16               | Endothelial cell proliferation                        |
| Chemotaxis                                | 17               | Chemotaxis                                            |
| Angiogenesis and proliferation            | 18               | Vasculature development                               |
|                                           | 19               | Epithelial cell proliferation                         |
|                                           | 20               | Regulation of epithelial cell proliferation           |
|                                           | 21               | Regulation of endothelial cell migration              |
|                                           | 22               | Epithelial cell migration                             |
|                                           | 23               | Regulation of vasculature development                 |
|                                           | 24               | Epithelium migration                                  |
|                                           | 25               | Regulation of angiogenesis                            |
|                                           | 26               | Angiogenesis                                          |
|                                           | Synapse assembly | 27                                                    |
| 28                                        |                  | Positive regulation of synapse assembly               |
| 29                                        |                  | Regulation of neurogenesis                            |
| 30                                        |                  | Regulation of nervous system development              |
| 31                                        |                  | Axon development                                      |
| 32                                        |                  | Regulation of cell junction assembly                  |
| 33                                        |                  | Synapse organization                                  |
| 34                                        |                  | Regulation of synapse structure or activity           |
| 35                                        |                  | Synapse assembly                                      |
| 36                                        |                  | Regulation of synapse assembly                        |
| Cell junction assembly                    | 37               | Cell junction assembly                                |
| Junction organization                     | 38               | Cell-substrate junction organization                  |
|                                           | 39               | Cell-substrate junction assembly                      |
| Cell adhesion                             | 40               | Cell-substrate adhesion                               |
|                                           | 41               | Positive regulation of cell-substrate adhesion        |
|                                           | 42               | Cell-matrix adhesion                                  |
|                                           | 43               | Substrate adhesion-dependent cell spreading           |
| Skin development                          | 44               | Epidermis development                                 |
|                                           | 45               | Hair cycle process                                    |
|                                           | 46               | Skin development                                      |
|                                           | 47               | Molting cycle process                                 |
|                                           | 48               | Hair follicle development                             |
|                                           | 49               | Skin epidermis development                            |
| Negative regulation of peptidase activity | 50               | Serine-type peptidase activity                        |
|                                           | 51               | Peptidase inhibitor activity                          |
|                                           | 52               | Negative regulation of peptidase activity             |
|                                           | 53               | Negative regulation of endopeptidase activity         |
|                                           | 54               | Negative regulation of proteolysis                    |
|                                           | 55               | Regulation of endopeptidase activity                  |
|                                           | 56               | Endopeptidase inhibitor activity                      |

| Pathway cluster                             | Annotation                | Pathway                                                                  |
|---------------------------------------------|---------------------------|--------------------------------------------------------------------------|
| Regeneration                                | 1                         | Regeneration                                                             |
| Axon regeneration                           | 2                         | Response to axon injury                                                  |
|                                             | 3                         | Axon regeneration                                                        |
|                                             | 4                         | Neuron projection regeneration                                           |
|                                             | 5                         | Basement membrane assembly                                               |
| Endodermal cell development                 | 6                         | Endoderm development                                                     |
| Endodermal cell differentiation             | 7                         | Formation of primary germ layer                                          |
|                                             | 8                         | Endoderm formation                                                       |
|                                             | 9                         | Endodermal cell differentiation                                          |
|                                             | 10                        | Gastrulation                                                             |
| Schwann cell differentiation                | 11                        | Schwann cell differentiation                                             |
| Neuron cell differentiation and development | 12                        | Axon ensheathment                                                        |
|                                             | 13                        | Glial cell development                                                   |
|                                             | 14                        | Glioneogenesis                                                           |
|                                             | 15                        | Ensheathment of neurons                                                  |
|                                             | 16                        | Myelination                                                              |
|                                             | 17                        | Glial cell differentiation                                               |
|                                             | Response to growth factor | 18                                                                       |
| 19                                          |                           | Regulation of cellular response to growth factor stimulus                |
| 20                                          |                           | Response to transforming growth factor beta                              |
| 21                                          |                           | Cellular response to growth factor stimulus                              |
| 22                                          |                           | Response to growth factor                                                |
| 23                                          |                           | Transforming growth factor beta receptor signaling pathway               |
| 24                                          |                           | Transmembrane receptor protein serine/threonine kinase signaling pathway |
| 25                                          |                           | Enzyme linked receptor protein signaling pathway                         |
| Tyrosine phosphorylation                    | 26                        | Transmembrane receptor protein kinase activity                           |
|                                             | 27                        | Positive regulation of peptidyl-tyrosine phosphorylation                 |
|                                             | 28                        | Transmembrane receptor protein tyrosine kinase signaling pathway         |
|                                             | 29                        | Peptidyl-tyrosine modification                                           |
|                                             | 30                        | Protein tyrosine kinase activity                                         |
|                                             | 31                        | Regulation of peptidyl-tyrosine phosphorylation                          |
